# Supplementary material
Source: publisher figshare collection journal article supplement (https://tandf.figshare.com/articles/dataset/_/21829551)
Supplement: Supplementary file 1 [file 1]

# **Survenue soudaine de pertes et de gains durant une thérapie cognitivo-comportementale dans le traitement d'un état de stress post-traumatique après abus sexuels infantiles**

Antje Krüger, Thomas Ehring, Kathlen Priebe, Anne S. Dyer, Regina Steil, Martin Bohus

## **Abstract**

**Contexte :** les techniques d'exposition sont des traitements de première intention pour les patients souffrant d'état de stress post-traumatique (ESPT). Néanmoins, la diffusion de ces thérapies d'exposition dans le traitement de l'ESPT reste un défi, car de nombreux cliniciens se déclarent concernés par l'aggravation des symptômes résultant de ce type d'intervention et sont ainsi réticents à proposer cette thérapie aux patients atteints d'ESPT. Il existe cependant peu d'évidences empiriques sur les schémas d'aggravation de symptômes durant les thérapies d'exposition pour l'ESPT.

**Objectif :** le but de cette étude a été d'explorer la fréquence de pertes et de gains soudains au cours d'un programme de traitement par exposition pour des femmes souffrant d'ESPT lié à des abus sexuels infantiles et présentant de sévères comorbidités. De plus, la relation entre ces changements soudains et les résultats du traitement a été examinée.

**Méthodes :** 74 femmes ont été randomisées vers un programme résidentiel cognitivo-comportemental de 12 semaines ou alors vers une liste d'attente avec traitement usuel. Le schéma de changement symptomatologique a été évalué de façon hebdomadaire avec l'Échelle Diagnostique Post-Traumatique (PDS). Les changements soudains ont été calculés comme suggéré par la littérature sur les gains soudains.

**Résultats :** durant le traitement, seul un participant (3%) a fait l'expérience d'une perte soudaine, alors que 25 % des participants ont fait l'expérience d'un gain soudain. Dans la condition d'attente, 8 % des participants ont fait l'expérience d'une perte soudaine et 5 % d'un gain soudain durant la même période. Aucune aggravation de symptôme n'a été observée en réponse aux sessions d'exposition. Cependant, des gains soudains sont apparus durant les semaines d'exposition et de non-exposition. Les patients avec des gains soudains ont présenté de meilleurs résultats de traitement durant les évaluations de post-traitement et de suivi.

**Conclusions :** dans cet échantillon, les thérapies d'exposition n'ont pas mené à une aggravation des symptômes de l'ESPT. Les résultats montrent que les gains soudains apparaissent fréquemment durant le traitement de l'ESPT et ont une valeur pronostique concernant les résultats des traitements.

**Keywords:** État de stress post-traumatique ; aggravation de symptômes ; changements soudains ; thérapie d'exposition

**Name of translator:** Marc Legrand

**Citation:** European Journal of Psychotraumatology 2014, 5: 24470 - <http://dx.doi.org/10.3402/ejpt.v5.24470>
