# Supplementary material
Source: publisher figshare collection journal article supplement (https://tandf.figshare.com/articles/dataset/_/21829551)
Supplement: Supplementary file 2 [file 1]

## **Çocukluk çağı cinsel istismarı sonrasındaki Travma Sonrası Stres Bozukluğu için DDT (Diyalektik Davranışçı Terapi)-TSSB tedavisi sürecindeki ani kayıplar ve ani kazanımlar**

Antje Krüger, Thomas Ehring, Kathlen Priebe, Anne S. Dyer, Regina Steil, Martin Bohus

**Arkaplan:** Kanıta dayalı tedavi yaklaşımları Travma Sonrası Stres Bozukluğu (TSSB) tanılı hastalar için kullanılan başlangıç müdahaleleridir. Ancak, klinisyenlerin büyük çoğunluğunun bu tür bir müdahaleden sonra belirtilerin kötüleşmesinden endişe duymaları ve bu sebeple TSSB hastalarına bu tedaviyi önermekte isteksiz olmaları sebebiyle TSSB'nin kanıta dayalı tedavisinin yayılması zordur. Ancak TSSB'nin kanıta dayalı tedavisinin belirtileri kötüleştirdiğine dair bir örüntü üzerine bugüne kadar sadece çok az deneysel kanıt vardır.

**Amaç:** Mevcut araştırmanın amacı çocukluk çağı cinsel istismarına bağlı TSSB tanılı ve aynı zamanda ciddi eş zamanlı hastalıklar sergileyen kadın hastalarda kanıta dayalı terapi programı esnasında yaşanan ani kayıp ve ani kazanımların sıklığını araştırmaktır. Ayrıca, ani değişimler ve tedavi sonuçları arasındaki ilişki de incelenmiştir.

**Yöntem:** Kadın katılımcılar (N=74) 12 haftalık hastane dışı DDT-TSSB programı ya da standart tedavi bekleme listesine rastgele seçilmiştir. Belirti örüntülerindeki değişiklikler Travma Sonrası Stres Tanı Ölçeği (Posttraumatic Diagnostic Scale, PDS) ile haftalık olarak ölçülmüştür. Ani değişimler, ani kazanımlar literatüründe önerildiği şekilde hesaplanmıştır.

**Sonuçlar:** Tedavi suresince sadece bir katılımcı (%3) ani bir kayıp yaşamışken, katılımcıların %25'i ani kazanım yaşamıştır. Aynı süre zarfında bekleme koşulundaki katılımcıların %8'i ani kayıp ve %5'i ani kazanımlar yaşamıştır. Maruz bırakma seanslarına karşılık hiçbir belirtide kötüleşme gözlemlenmemiştir. Ancak, ani kazanımlar maruz bırakma ve maruz bırakma olmayan tedavi haftalarında gerçekleşmiştir. Ani kazanımları olan hastaların tedavi sonrası ve takip değerlendirmelerinde gösterdikleri tedavi sonuçları daha iyidir.

**Tartışma:** Çalışma örnekleminde maruz bırakma temelli tedaviler TSSB belirtilerinde kötüleşmeye sebep olmamıştır. Sonuçlar, TSSB tedavisinde ani kazanımların sıkça görülmekte olduğunu ve bunların tedavi sonuçları açısından prognostik değere sahip olduğunu göstermiştir.

**Anahtar kelimeler:** Travma sonrası stres bozukluğu; semptom kötüleşmesi; ani değişimler; maruz bırakma temelli tedavi

Name of translator: Emek Yuce Zeyrek-Rios
