# Supplementary material
Source: publisher figshare collection journal article supplement (https://tandf.figshare.com/articles/dataset/_/21829551)
Supplement: Supplementary file 3 [file 1]

## **Hirtelen tünetromlás és javulás DBT-PTSD kezelés közben gyermekkori szexuális bántalmazást elszenvedettek körében**

Antje Krüger, Thomas Ehring, Kathlen Priebe, Anne S. Dyer, Regina Steil, Martin Bohus

Háttér: Az expozíció alapú terápiás eljárások az elsődlegesen ajánlott intervenciók poszttraumás stressz zavartól (PTSD) szenvedő betegek esetében. Ennek a terápiás módszernek a disszeminációja azonban nehézkes, mivel a klinikusok arról számolnak be, hogy vonakodnak a terápia alkalmazásától mivel félnek a tünetek romlásától. Ennek ellenére, kevés empirikus bizonyíték van arra vonatkozóan, hogy a tünetek valóban romlanának a terápiás módszer alkalmazása esetén.

Célkitűzés: Jelen vizsgálat célja, egy expozíció alapú terápia során fellépő hirtelen (pozitív és negatív) változások feltérképezése, gyermekkori szexuális abúzust elszenvedett súlyos komorbid tüneteket mutató nőbetegek körében. Ezen felül, a terápia közbeni változások és a terápia kimenetele közti kapcsolatot is vizsgálták.

Módszer: A női résztvevőket (N = 74) randomizálták vagy egy 12 hetes DBT-PTSD programba vagy a TAU várólistára. A tüneti változás mintázatát heti rendszerességgű tünetfelméréssel érték el, amelyet a Poszttraumás Diagnosztikus Skálával (PDS) mértek. A hirtelen változások a szakirodalomban fellelt módszerekkel operacionalizálták.

Eredmények: A kezelés alatt csak egy személynél (3%) volt tünetromlás, míg 25%-nál javulás volt. A várólistán, 8%-nál volt romlás, míg 5%-nál hirtelen javulás ugyanabban az időszakban.

Nem volt tünetromlás az expozíciós ülésekkel közvetlen összefüggésben. Azonban a hirtelen javulások mind az expozíciós, mind a nem expozíciós ülések hetében is történt. Azok, akiknél volt javulás jobb terápiás kimenetelt és follow-up értékeket mutattak.

Következtetések: Az expozíció alapú terápia nem vezetett tünetromláshoz ezen a mintán. Az eredmények azt mutatják, hogy hirtelen javulás gyakrabban fordul elő PTSD terápia közben és a terápiás kimenetelre bejósoló ereje van.

Keywords: poszttraumás stressz zavar, tünetromlás, hirtelen változások, expozíció alapú kezelés

Name of translator: Kinga Fodor

Citation: European Journal of Psychotraumatology 2014, 5: 24470 -<http://dx.doi.org/10.3402/ejpt.v5.24470>
