# Supplementary material
Source: publisher figshare collection journal article supplement (https://tandf.figshare.com/articles/dataset/_/21829551)
Supplement: Supplementary file 4 [file 1]

## **Sudden losses and sudden gains during a DBT-PTSD treatment for posttraumatic stress disorder following childhood sexual abuse**

Antje Krüger, Thomas Ehring, Kathlen Priebe, Anne S. Dyer, Regina Steil, Martin Bohus

Nieoczekiwane straty i nieoczekiwane zyski podczas terapii PTSD wywołanego traumą wykorzystywania seksualnego w dzieciństwie metodą DBT-PTSD

Wprowadzenie: Terapie ekspozycyjne stanowią metodę leczenia pierwszego rzutu dla pacjentów z zaburzeniem po stresie traumatycznym. Jednakże duża część klinicystów coraz częściej podkreśla również negatywne strony tego podejścia w procesie leczenia PTSD, zwracając uwagę na przypadki nasilenia symptomów PTSD w następstwie stosowania technik ekspozycyjnych.

Cel: Celem niniejszego badania było określenie częstości występowania nieoczekiwanych zysków i nieoczekiwanych strat podczas programu leczenia metodami ekspozycyjnymi kobiet cierpiących na PTSD wywołanego traumą wykorzystywania seksualnego w dzieciństwie.

Metoda: Zbadano 74 kobiety, które przydzielono losowo albo do 12-tygodniowego, nowatorskiego programu leczenia metodą DBT-PTSD bądź do terapii metodą tradycyjną. Zmiany w nasileniu symptomów potraumatycznych mierzone były za pomocą skali PDS.

Wyniki: Podczas leczenia metodą DBT-PTSD, tylko jedna osoba badana doświadczyła nieoczekiwanej straty, podczas gdy 25% badanych doznało nieoczekiwanych zysków.

Tymczasem w przypadku leczenia metodą standardową 8% badanych doświadczyło nieoczekiwanych strat, a 5% doznało nieoczekiwanych zysków. Pacjenci z nieoczekiwanymi zyskami przedstawiali lepsze rezultaty leczenia.

Konkluzje: Terapia ekspozycyjna nie doprowadziła do nasilenia symptomów PTSD wśród badanych. Wyniki niniejszych badań wskazują ponadto, że podczas terapii PTSD zdarzają się nieoczekiwane zyski z leczenia, które mają dużą wartość prognostyczną dla jego dalszych efektów.

Słowa kluczowe: Zaburzenie po stresie traumatycznym; nasilenie symptomów; nieoczekiwane zmiany; terapia ekspozycyjna

Name of translator: Marcin Rzesutek, University of Finance and Management in Warsaw, Poland
