# Supplementary material
Source: publisher figshare collection journal article supplement (https://tandf.figshare.com/articles/dataset/_/21829551)
Supplement: Supplementary file 5 [file 1]

## **Pérdidas y ganancias repentinas durante un tratamiento de terapia dialéctica conductual para trastorno de estrés postraumático (DBT-TEPT) después del abuso sexual en la infancia**

Antje Krüger, Thomas Ehring, Kathlen Priebe, Anne S. Dyer, Regina Steil, Martin Bohus

**Antecedentes:** Los enfoques de tratamiento basados en la exposición son intervenciones de primera línea para pacientes que sufren de trastorno de estrés postraumático (TEPT). Sin embargo la difusión de tratamientos basados en la exposición para TEPT es todo un reto, dado que un gran porcentaje de terapeutas indican estar preocupados por un empeoramiento de los síntomas como resultado de este tipo de intervención y por tanto son reacios a ofrecérselo a pacientes con TEPT.

**Objetivo:** El objetivo del presente estudio era explorar la frecuencia de las pérdidas y ganancias repentinas en el curso de un programa de tratamiento basado en la exposición para pacientes mujeres que sufrían de TEPT relacionado con abuso sexual en la infancia y que también mostraban una comorbilidad severa. Además, la relación entre los cambios repentinos y el resultado del tratamiento también fue examinada.

**Métodos:** Las participantes femeninas (N=74) fueron asignadas aleatoriamente o bien a una programa residencial de DBT-TEPT de 12 semanas o a una lista de espera de un tratamiento usual. El patrón de los cambios de los síntomas fue evaluado a través de evaluaciones semanales usando la escala de diagnóstico postraumático (PDS, por sus siglas en inglés). Los cambios repentinos fueron calculados como sugiere la literatura sobre ganancias repentinas.

**Resultados:** Durante el tratamiento, sólo un participante (3%) experimentó una pérdida repentina, mientras que el 25% de los participantes experimentaron ganancias repentinas. En la condición de espera, el 8% de los participantes experimentaron pérdidas repentinas y el 5% experimentaron ganancias repentinas durante el mismo período. No se observó empeoramiento de los síntomas en respuesta a las sesiones de exposición. Sin embargo, las ganancias repentinas ocurrieron durante las semanas de tratamiento de exposición y no exposición. Los pacientes con ganancias repentinas mostraron mejores resultados del tratamiento en las evaluaciones post-tratamiento y de seguimiento.

**Conclusiones:** El tratamiento basado en la exposición no dio lugar al empeoramiento de los síntomas en la muestra del estudio. Los resultados muestran que las ganancias repentinas ocurren frecuentemente durante el tratamiento de TEPT y tienen un valor pronóstico para el resultado del tratamiento.

**Keywords:** Trastorno de estrés postraumático, empeoramiento de los síntomas, cambios repentinos, tratamiento basado en la exposición

**Name of translator:** Miriam Ramos Morrison

**Citation:** European Journal of Psychotraumatology 2014, 5: 24470 -<http://dx.doi.org/10.3402/ejpt.v5.24470>
